# Supplementary material for: A diaphragmatic electrical activity-based optimization strategy during pressure support ventilation improves synchronization but does not impact work of breathing
Source: Springer Nature journal article supplement (doi:10.1186/s13054-017-1599-z), 2017-01-25

**A**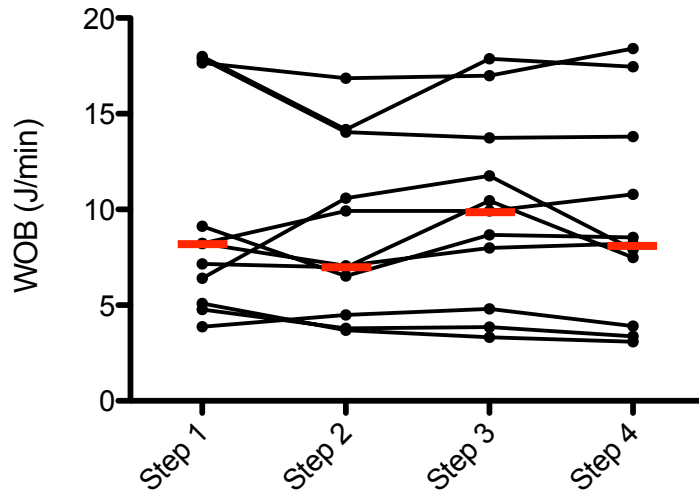**B**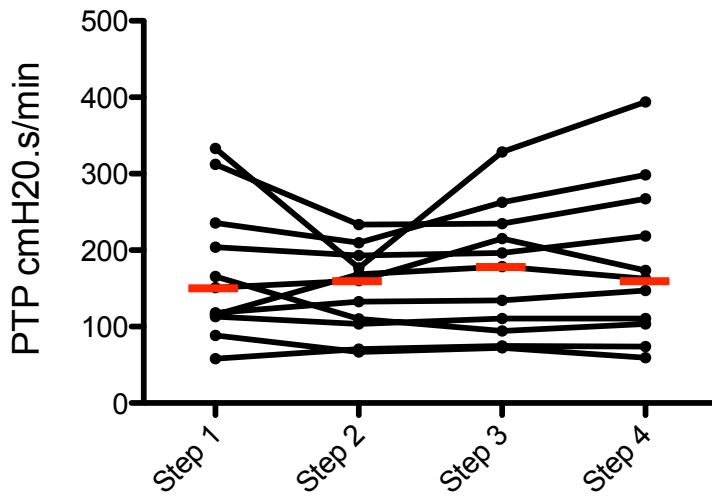

Supplement: MOESM5 [file 12030130]
